# Supplementary material for: Implications of Dengue Virus Maturation on Vaccine Induced Humoral Immunity in Mice
Source: MDPI journal article supplement (doi:10.3390/v13091843), 2021-09-15
Supplement: s1 [file s1]

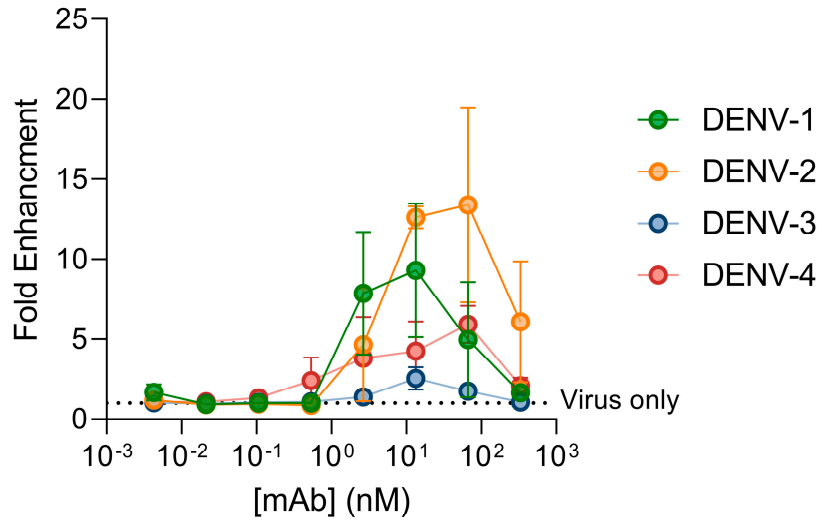

**Figure S2. ADE of DENV 1-4 by mAb 4G2.** Fold enhancement of infection by 4G2 in K562 cells relative to virus only control of DENV-1, DENV-2, DENV-3, and DENV-4 as determined by sNS1 capture ELISA. Each data point represents the mean of two independent replicates  $\pm$  SD.
